# Supplementary material for: Eculizumab in Shiga toxin-producing Escherichia coli hemolytic uremic syndrome: a systematic review
Source: Springer Nature journal article supplement (doi:10.1007/s00467-023-06216-1), 2023-12-06
Supplement: MOESM2 [file 26498922]

Article title: Eculizumab in Shiga toxin-producing Escherichia coli hemolytic uremic syndrome: a systematic review

Journal name: Pediatric Nephrology

Author names: Paul L. de Zwart\*, Thomas F. Mueller, Giuseppina Spartà, Valerie A. Luyckx

\*Corresponding author, email [paullambertus.dezwardt@uzh.ch](mailto:paullambertus.dezwardt@uzh.ch)

Affiliation corresponding author: University Children's Hospital Zurich, department of Nephrology, Zurich, Switzerland

All searches were performed on 2022, March 02

**Pubmed:**

((hemolytic uremic syndrome[MeSH]) OR (syndrome, hemolytic uremic[MeSH]) OR "hemolytic uremic syndrome"[tiab] OR "haemolytic uraemic syndrome"[tiab] OR HUS[tiab] OR "STEC-HUS"[tiab] OR "D+HUS"[tiab] OR (thrombotic microangiopathy[MeSH]) OR "thrombotic microangiopath\*" [tiab] OR TMA[tiab]) AND (eculizumab[tiab] OR soliris\*[tiab])

997 results

**Web of Science (all databases):**

TS=("hemolytic uremic syndrome" OR "haemolytic uraemic syndrome" OR \*HUS OR "thrombotic microangiopath\*" or TMA) AND TS=(eculizumab OR soliris\*)

2242 results

**Embase:**

('hemolytic uremic syndrome':ti,ab OR 'haemolytic uraemic syndrome':ti,ab OR hus:ti,ab OR 'stec-hus':ti,ab OR 'd+hus':ti,ab OR 'thrombotic microangiopath\*':ti,ab OR tma:ti,ab) AND (eculizumab:ti,ab OR soliris\*:ti,ab)

2035 results
